1 **Beyond Active Learning: Using 3-Dimensional Learning to Create Scientifically**  
2 **Authentic, Student-Centered Classrooms**

3

4 Melanie M Cooper<sup>1</sup>, Marcos D. Caballero<sup>2,3,4</sup>, Justin H. Carmel<sup>5</sup>, Erin M. Duffy<sup>6</sup>, Diane Ebert-  
5 May<sup>7</sup>, Cori L. Fata-Hartley<sup>8</sup>, Deborah G. Herrington<sup>9</sup>, James T. Lavery<sup>10</sup>, Paul C. Nelson<sup>8</sup>,  
6 Lynmarie A. Posey<sup>1</sup>, Jon R. Stoltzfus<sup>11</sup>, Ryan L. Stowe<sup>12</sup>, Ryan D. Sweeder<sup>13</sup>, Stuart Tessmer<sup>2</sup>,  
7 Sonia M. Underwood<sup>5</sup>.

8

- 9 1. Department of Chemistry, Michigan State University, East Lansing, Michigan, United  
10 States of America
- 11 2. Department of Physics & Astronomy, Michigan State University, East Lansing, Michigan,  
12 United States of America
- 13 3. Department of Computational Science, Mathematics, and Engineering, Michigan State  
14 University, East Lansing, Michigan, United States of America
- 15 4. Department of Physics and Center for Computing in Science Education, University of  
16 Oslo, Oslo, Norway
- 17 5. Department of Chemistry & Biochemistry and STEM Transformation Institute, Florida  
18 International University, Miami, Florida, United States of America
- 19 6. Science Department, Solebury School, New Hope, Pennsylvania, United States of  
20 America
- 21 7. Department of Plant Biology, Michigan State University, East Lansing, Michigan, United  
22 States of America
- 23 8. Human Biology Program, Michigan State University, East Lansing, Michigan, United  
24 States of America
- 25 9. Department of Chemistry, Grand Valley State University, Allendale, Michigan, United  
26 States of America
- 27 10. Department of Physics, Kansas State University, Manhattan, Kansas, United States of  
28 America
- 29 11. Department of Biochemistry and Molecular Biology, East Lansing, Michigan, United  
30 States of America
- 31 12. Department of Chemistry, University of Wisconsin – Madison, Madison, Wisconsin,  
32 United States of America
- 33 13. Lyman Briggs College, Michigan State University, East Lansing, Michigan, United States  
34 of America

35

36  
37  
38

39 **Abstract**

40 In recent years, much of the emphasis for transformation of introductory STEM courses has  
41 focused on “active learning”, and while this approach has been shown to produce more  
42 equitable outcomes for students, the construct of “active learning” is somewhat ill-defined, and  
43 can encompass a wide range of pedagogical techniques. Here we present an alternative  
44 approach for how to think about the transformation of STEM courses that focuses instead on  
45 what students should know and what they can do with that knowledge. This approach, known as  
46 three-dimensional learning (3DL), emerged from the National Academy’s “A Framework for K-12  
47 Science Education”, which describes a vision for science education that centers the role of  
48 constructing productive causal accounts for phenomena. Over the past 10 years, we have  
49 collected data from introductory biology, chemistry, and physics courses to assess the impact of  
50 such a transformation on higher education courses. Here we report on an analysis of video data  
51 of class sessions that allows us to characterize these sessions as *active*, *3D*, *neither*, or *both 3D*  
52 *and active*. We find that 3D classes are likely to also involve student engagement (i.e. be  
53 active), but the reverse is not necessarily true. That is, focusing on transformations involving  
54 3DL also tends to increase student engagement, whereas focusing solely on student  
55 engagement might result in courses where students are engaged in activities that do not involve  
56 meaningful engagement with core ideas of the discipline.

57  
58

## 59 Introduction

60 Over the past twenty years, the wide array of pedagogical techniques that have come to  
61 be collectively known as active learning (1), or evidence-based instructional practices (EBIPs)  
62 (2), have been the predominant focus for transformation efforts in higher education STEM  
63 teaching and learning. A meta-analysis across a wide range of STEM disciplines found that the  
64 use of active learning techniques tends to increase average course grades, particularly by  
65 decreasing the DFW (D's, F's and withdrawals) rate (3). In addition, active learning appears  
66 particularly helpful in promoting more equitable outcomes for students (4,5). Thus, many faculty  
67 development efforts focus on evidence-based instructional practices (EBIPs) that increase  
68 student engagement in the classroom (6–8), although studies have also shown that their uptake  
69 is somewhat disappointing (9).

70  
71 However, as discussed in “The Curious Construct of Active Learning”, an extensive  
72 overview and synthesis of the literature on active learning across STEM disciplines (1), the  
73 construct of active learning is amorphous; it can refer to minor adaptations to lecture-based  
74 courses, such as the use of student response systems, or to flipped classrooms, or to  
75 completely re-envisioned curricula taught in studio classrooms. Freeman et al., in their highly  
76 cited meta-analysis on the impact of active learning (3) do not disaggregate findings by  
77 instructional strategy, and use the following definition to determine which courses engaged  
78 students in active learning: “*Active learning engages students in the process of learning through*  
79 *activities and/or discussion in class, as opposed to passively listening to an expert. It*  
80 *emphasizes higher-order thinking and often involves group work.*” It is notable that these  
81 authors do not say more about *what* students are learning, other than a reference to higher-  
82 order thinking; a construct that is subject to multiple definitions (10). Thus, the often ill-defined  
83 construct of active-learning is characterized by another ill-defined construct.

84

85           Certainly, the evidence is clear that student engagement is a necessary, but perhaps not  
86 sufficient, component of learning for most students (11). However, evidence for the use of  
87 EBIPs or active learning strategies typically does not include discussions of *what is being*  
88 *learned* during the instruction, or how students are able to use that knowledge. Most studies on  
89 the impact of active learning on student outcomes rely either on either scores on conceptual  
90 multiple-choice exams or course grades (3), but typically little information is provided about what  
91 those grades are measuring, and whether they emphasize factual recall or use of knowledge.  
92 We have previously argued that it is not sufficient to know facts (or even concepts) or to solve  
93 rote mathematical exercises; students should be able to use their knowledge to explain, model,  
94 and predict phenomena by engaging in Three-Dimensional Learning (3DL) (12).

95

96           3DL was originally developed in the National Academies consensus report “A  
97 Framework for K-12 Science Education” which lays out a vision for science education that  
98 centers the role of constructing productive causal accounts for phenomena (13). The  
99 “Framework” proposes that three interconnected dimensions of science learning are central to  
100 the vision: Scientific and Engineering Practices, Disciplinary Core Ideas, and Crosscutting  
101 Concepts, as shown in Figure 1.

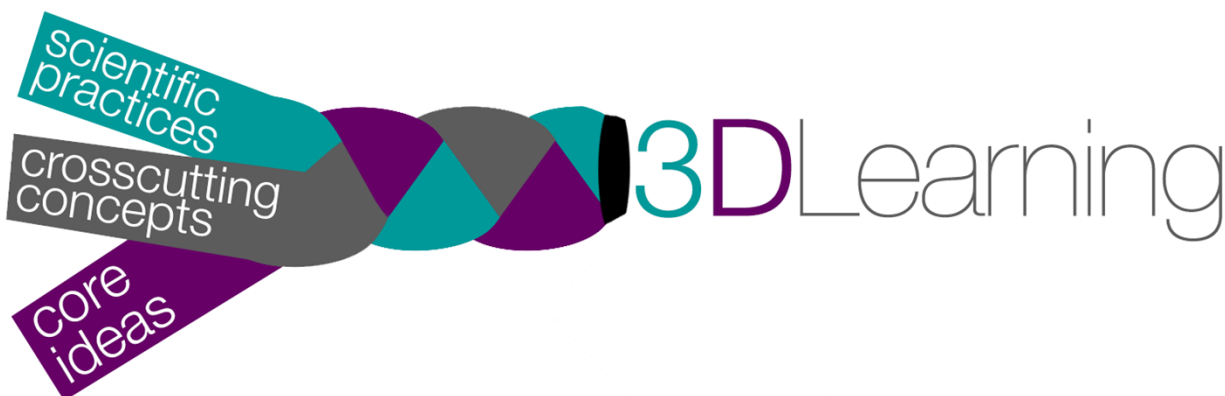

102 Figure 1: The three dimensions, Scientific and Engineering Practices, Disciplinary Core Ideas,  
103 and Crosscutting Concepts, are intertwined to form 3D-Learning.

104

105 The Scientific and Engineering Practices are the ways that scientists use and engage  
106 with their knowledge – for example, asking questions or defining problems, developing and  
107 using models, and evaluating and communicating information. The Core Ideas of a discipline  
108 are the underlying ideas that have broad applicability and can be used to predict and explain  
109 phenomena at different levels of depth and complexity. For example, in biology the core idea of  
110 evolution underlies a vast range of phenomena; atomic and molecular interactions and bonding  
111 play a similar role in chemistry, as do fields as the mediators of interactions in physics. The  
112 Crosscutting Concepts can be thought of as lenses that transcend disciplines and allow  
113 scientists to focus their investigation of a phenomenon on specific aspects – for example, cause  
114 and effect, structure and function, and stability and change. The Framework emphasizes that,  
115 for meaningful learning, the three dimensions must be inextricably intertwined. For example, if  
116 we want our students to be able to model (a Scientific Practice) how energy (a Core Idea) is  
117 transferred within or between systems (a Crosscutting Concept), all three dimensions must be  
118 combined during instructional and assessment activities. A focus on content without considering  
119 how students should use that knowledge can lead to fragmented, disconnected understanding  
120 and inert knowledge that is not useful in new contexts (13). Consequently, it is important to

121 intentionally build all three dimensions into learning objectives, assessments, and classroom  
122 activities.

123  
124 This approach has been the focus of a multidisciplinary project to transform the STEM  
125 gateway (introductory biology, chemistry and physics) courses at Michigan State University  
126 (MSU) by adapting the Framework for use in higher education (12). In this approach, we  
127 adopted the Scientific Practices and Crosscutting Concepts as presented in the Framework with  
128 minor modifications. However, the Core Ideas presented in the Framework were originally  
129 developed for a more interdisciplinary approach to K-12 science teaching and learning (for  
130 example, Core Ideas are presented for physical science), which does not align with how  
131 introductory science courses are organized at the college level. Furthermore, the Core Ideas  
132 were not intended for the depth of college science courses. We worked collaboratively with  
133 disciplinary experts and introductory course instructors from chemistry, biology, and physics to  
134 define more appropriate Core Ideas for those disciplines (14,15).

135  
136 To evaluate the extent of the transformation, we developed two protocols, the Three-  
137 Dimensional Learning Assessment Protocol (3D-LAP) (15) and the Three-Dimensional Learning  
138 Observation Protocol (3D-LOP) (16), that are intended to characterize the extent to which  
139 assessments and instruction incorporate 3D learning. The 3D-LAP allows us to determine  
140 whether an assessment task has the potential to elicit a 3D response from students. We have  
141 previously reported on the use of the 3D-LAP as a tool to evaluate the change in 3D  
142 assessment over time (17) by coding over 4,000 examination questions from midterm and final  
143 exams that were used in the introductory courses. These earlier findings show that the 3D-LAP  
144 is a useful tool for characterizing the extent of transformation which focuses on student use of  
145 knowledge in the context of Core Ideas. Our findings showed that for a large general chemistry  
146 course that was completely transformed using the 3DL approach (18), with around 50% of exam

147 points associated with 3D tasks on course exams, the average grades in the course increased,  
148 and the percentage of students who received a D, F or W in the course decreased (17). That is,  
149 we saw similar overall outcomes to those reported for courses that employ active learning.  
150 Another study showed that 3DL assessment tasks focusing on mechanistic reasoning about a  
151 chemical phenomenon are more equitable than typical general chemistry tasks involving  
152 calculations that are more traditionally featured on such exams (19).

153 We note that the 3D-LAP can only give us a measure of *the potential* of an assessment  
154 item to elicit 3DL. To determine whether students are actually engaging in 3DL requires that we  
155 analyze student responses to such assessment tasks, and study how students construct these  
156 responses. There are now a number of studies in which responses from matched cohorts of  
157 students, from both traditional and transformed sections of a course, were analyzed (20–25). In  
158 general, these studies show that students in 3DL courses are significantly more likely to engage  
159 in construction of mechanistic explanations and construction and use of models in the context of  
160 3D tasks. Another study asked students “what kind of thinking” they were expected to engage  
161 in for a given course, and what kinds of thinking course assessments tested (26). Students in a  
162 3DL-transformed organic chemistry course were most likely to respond that they were expected  
163 to use their knowledge (apply and reason), whereas students in a traditional section were more  
164 likely to perceive that they were expected to memorize information.

165 One intriguing study compared three student cohorts from different institutions on a task  
166 that asked students to explain how and why a substance dissolved in water (27). All instructors  
167 agreed that students would have learned about this phenomenon and should be able to  
168 complete the task. The three different institutions employed three different instructional  
169 approaches: 1) a traditional lecture (didactic) course with a traditional curriculum, 2) an active  
170 learning approach with a traditional curriculum, and 3) a 3DL approach with transformed  
171 curriculum and assessments that included 3D tasks. Students in the didactic and active learning  
172 courses provided similar responses, while the 3DL students were far more likely to construct a

173 full explanation for the phenomenon, invoking ideas about both interactions and bonding, and  
174 energy changes. Although we should not be surprised that students who were enrolled in  
175 traditional courses were less able to provide appropriate responses to a 3DL task (students tend  
176 to learn what is emphasized in a course), we also note that the active learning students  
177 performed similarly to those who listened to lectures. This indicates that active learning alone  
178 does not support students' understanding of mechanistic reasoning and chemical phenomena if  
179 the curriculum does not intentionally include activities that require students to use knowledge in  
180 this way.

181         3DL can also support the integration of important and overlooked scientific practices.  
182 Using a computer to model scientific phenomenon and data is central to the enterprise of  
183 science, and yet, computational modeling is absent from most introductory science instruction.  
184 Some introductory physics courses use computational modeling activities to support students as  
185 they make predictions or construct explanations (28). Instructional strategies used in computer  
186 science education, such as pair programming (29,30) and live-coding (31), have been used in  
187 disciplinary courses to ensure students are active in their learning of computational modeling.  
188 However, research conducted in our introductory physics courses has demonstrated that such  
189 active learning strategies alone are not sufficient to promote 3DL. However, newer  
190 computationally enabled physics courses at MSU that characterized as 3D and are designed  
191 around a communities of practice framework (32,33) have been shown to support the ways in  
192 which students work in their groups as they develop computational models for real-world  
193 phenomena (34,35).

194         While analyzing the types of assessment tasks and concomitant student responses has  
195 provided us with compelling evidence for the efficacy of 3DL, it does not provide information  
196 about the instructional practices employed during instructional activities. To address this need,  
197 we developed the 3D-LOP, which can be used to characterize instruction by coding classroom  
198 video recordings. The 3D-LOP is, in some ways, similar to other classroom observation



199 protocols, such as the COPUS or RTOP (36,37), because it provides a way to characterize the  
200 instructional methods used in a classroom. What sets the 3D-LOP apart from other such  
201 observation protocols is that it also allows the user to characterize *what is being taught* as well  
202 as *the way that it is taught*. Thus, the 3D-LOP provides a way to characterize a class period by  
203 the topic covered, instructional activities, whether the instruction is aligned with 3DL, and  
204 whether that instruction is student- or instructor-centered. Full details of the development and  
205 coding protocols for the 3D-LOP have been published previously (16).

206

207 Using class video recordings, we are now able to investigate the enactment of 3DL in these  
208 introductory biology, chemistry, and physics classes and to determine whether there is a  
209 connection between 3DL and the more common approach to reform that typically focuses on  
210 instructional practices and student engagement (i.e., active learning). We have evidence that  
211 transformation efforts using different approaches (e.g., 3DL or active learning) do tend to result  
212 in some of the same outcomes (for example, improved average grades, retention rates, and  
213 more equitable outcomes). However, as noted earlier, there are aspects of 3DL that go beyond  
214 active learning. For example, students who are enrolled in courses where active engagement,  
215 but not where 3DL is prevalent, are unlikely to provide causal explanations for phenomena (27).  
216 Additionally, 3DL supports inclusion of scientific practices that are often neglected, such as  
217 computational modelling (28). It also explicitly defines what is expected as outcomes for a  
218 course; rather than “knowing” or “understanding,” students perceive that they are going to apply  
219 and reason with their knowledge (26).

220 Now that we have the methodology to characterize whether 3DL and/or active learning take  
221 place during class instruction, the current study uses evidence from class session video  
222 recordings to address the following research questions:

223

224 1. In what ways can 3DL and/or active learning occur within a STEM course?

225 2. How are 3DL and active learning related?

226

## 227 **Experimental Methods**

228 The data corpus explored in this report is composed of video recordings of in-class  
229 instruction collected over 4 years from introductory biology, chemistry, and physics courses at  
230 Michigan State University. As discussed in our earlier paper (16), the camera was mounted at  
231 the back of the classroom to record the instructor activities and interactions between instructor  
232 and students. All the instructors in our data set gave permission for their classes to be video  
233 recorded and for their course exams to be analyzed. All identifying information, such as  
234 instructor name, course ID, semester, etc. were removed before coding, and randomly  
235 generated identifiers were applied to the video files, in accordance with our IRB-approved  
236 protocol.

237

## 238 **3D-LOP Analysis of Classroom Videos**

239

240 The 3D-LOP was used to code video recordings, as discussed in our prior work (16). For  
241 the present study, videos of 82 class meeting sessions across the gateway courses in biology,  
242 chemistry, and physics were recorded. Each video was segmented into blocks of contiguous  
243 time devoted to a particular topic of instruction. These segments (N=417) were then coded by  
244 two researchers from the team for alignment with the three dimensions and whether instruction  
245 was instructor- or student-centered. By instructor-centered, we mean the instructional activities  
246 were lecture-based, perhaps with call-and-response questioning. By student-centered, we mean  
247 more extensive instructor-student interactions, group or individual tasks, clicker questions and  
248 so on. This process allowed us to create parallel sets of timelines that provide information about

249 the topic being taught, the classroom activities, whether the instruction was 3D, and whether the  
250 topic segment was “student-centered” or “instructor-centered”. Here we define “active”  
251 segments as those with more than 50% of the time dedicated to teaching activities that directly  
252 engaged students (interactions, tasks, clicker questions), and 3D segments as those that spend  
253 more than 50% of the time on 3DL. We chose these criteria for simplicity and because other  
254 researchers have also used this cut off to determine whether active learning is present (5).  
255 Thus, a segment may be characterized as 3D and active, active only, 3D only, or neither 3D nor  
256 active. The data reported here do not include those used in our development of the 3D-LOP and  
257 were recorded over several years before the COVID pandemic.

258

## 259 **Results and Discussion**

260

### 261 **RQ 1: In what ways can 3DL and/or active learning occur within a STEM course?**

262

263 As discussed above, the data from coding class videos with the 3D-LOP allow us to  
264 develop visualizations of class timelines as shown in Figure 2. Each timeline shows the types of  
265 instructional activities (teaching activities) and the segments of class (or topics) that are three  
266 dimensional. Each 3DL segment is coded as instructor-centered (I) or student-centered (S),  
267 which allows us to determine: 1) the class time that is devoted to student engagement (active  
268 learning), 2) the class time that is devoted to 3DL, and 3) the class time that is devoted to both  
269 3DL and active learning. Figure 2 provides representative examples of such timelines, which  
270 can be characterized as (a) active but not 3D, (b) active and 3D, (c) 3D but not active, and (d)  
271 neither active nor 3D.

272

273 **Active but not 3D:** Instructional segments that employ active learning techniques at least 50%  
274 of the time but are not 3D are quite common in our data set (95 of 417 segments, see Figure 3);  
275 the timeline in Figure 2a exemplifies one such class session. In this introductory biology class  
276 session, students worked in groups on several activities, which we label as “Tasks”. These  
277 tasks included discussions on identifying the correct number of chromosomes for a given set of  
278 cells, drawing cells in different stages of cell division as the discussion of meiosis progressed,  
279 and identifying the genotype and phenotype of common traits (e.g., mid-digital hair).  
280 Punctuating these task segments were periods of lecturing in which the task is concluded or  
281 new topics are introduced. The tasks were focused on observation of elements of biological  
282 systems and building foundational skills. Although these tasks potentially build important  
283 foundational knowledge for biology and prepare students for future topics in the class, they do  
284 not engage students with any of the Scientific Practices. While most of the class period is  
285 devoted to student activities and is engaging students in a range of tasks, it is not asking  
286 students to use their knowledge in sensemaking activities, but rather the students are re-  
287 representing ideas in the form of pictures and diagrams.

288

289 **Active and 3D.** The data set contains 58 segments that are both active and 3D. An example of  
290 a class with 3 such segments is provided by the timeline in Figure 2b from a general chemistry  
291 course, in which the topic of solutions is discussed over several segments. Here, we see  
292 instructional approaches that included instructor-student interactions that go beyond lecture  
293 interactions, multiple tasks that engage students, and a series of clicker questions followed by  
294 group discussions. Aside from the segment designated as “Homework Review”, all topics were  
295 explored by means of at least one of the Scientific Practices, and 3 out of 4 of these segments  
296 in the class are three-dimensional. All the occurrences of Scientific Practices are characterized  
297 as student-centered. Students constructed explanations and models for themselves, rather than  
298 watching the instructor work through the reasoning. For instance, the activities focused on

299 students engaging with a hands-on activity (observing the dissolution of a salt and the  
300 accompanying temperature change). After scaffolded group discussions facilitated by the  
301 instructor, Graduate Teaching Assistants and Undergraduate Learning Assistants supported  
302 groups of students working to create an explanation for their observations and answer a series  
303 of clicker questions. By incorporating the Core Ideas of *Energy* and *Electrostatic and Bonding*  
304 *Interactions* and the Crosscutting Concept of *Systems and System Models*, students  
305 constructed a model that explained the observed temperature change, by relating it to the  
306 energy changes as various interactions are either broken or formed. While not all class sessions  
307 that are 3DL-aligned are as active, the co-occurrence of 3DL and active learning appears to be  
308 common in 3D class sessions as will be discussed later.

309  
310 **3D but not Active:** Not all classes that focus on 3DL are also student-centered (35 of 417  
311 segments), as illustrated by the timeline shown in Figure 2c, which depicts a traditional lecture  
312 in a large-enrollment general chemistry course. The class consisted of three different topic  
313 segments. Instruction began with a lecture review of Valence-Shell Electron-Pair Repulsion  
314 (VSEPR) Theory, followed by using that theory to understand how molecular dipoles can arise  
315 and how they can be used to predict molecular properties. Finally, hybrid orbital formation in  
316 bonding was described. After the VSEPR review, the instructor engaged students with the  
317 content by combining use of VSEPR as a model that predicts molecular shape and knowledge  
318 of bond polarities to predict the distribution of electron densities in a molecule. Molecular polarity  
319 was then used to predict and explain molecular properties. Although some student engagement  
320 occurred during this class session, it was either via call-and-response questioning or by the  
321 instructor addressing student questions during the lecture; therefore, we do not characterize the  
322 instruction in this class as active learning, since it did not incorporate activities usually  
323 designated as active learning, such as clicker questions, peer discussion, or group activities  
324 (1,3).

325           The non-active module on the use of molecular dipoles has been characterized as three-  
326 dimensional. However, in this case, the instructor was doing the work of demonstrating how to  
327 explore a phenomenon (why different molecular substances have different melting and boiling  
328 points), while employing the Scientific Practice of *Developing and Using Models* for their  
329 students (as indicated by the “(I)” on the diagram meaning an “instructor-centered segment”).  
330 By discussing the molecular shape and electron distribution, the instructor showed how the  
331 molecular structure can be used to predict molecular properties (a Core Idea), by using VSEPR  
332 as a model and the Crosscutting Concept of cause and effect (strong attractive interactions  
333 between polar molecules cause the macroscopic substance to exhibit predictable properties  
334 such as a high boiling point).

335  
336 **Neither Active nor 3D:** We have numerous examples of classroom recordings that are neither  
337 active, nor 3D (205 of 417 segments). Figure 2d provides an example of a physics class that  
338 meets this criterion. In this traditional-lecture, large-enrollment introductory electromagnetism  
339 course, the lecture focused on introducing the fundamental connections between electric fields  
340 and charges. These ideas are certainly important and foundational to much of the future  
341 curriculum. However, the instructor did not present the phenomena and key connections in a  
342 way that employed any Scientific Practices; hence, the class was not 3D. Although some  
343 student engagement occurred, it was either call-and-response questioning or the instructor  
344 addressed student questions during the lecture. Whereas many of the traditional-format physics  
345 courses in our database employed clicker questions and peer discussion, in this case the  
346 instructor did not engage students in this way. Hence, this class was not designated as  
347 including any active learning (Freeman et al., 2014; Lombardi et al., 2021).

348

349

350

| Topics              | Admin | Meiosis Is Necessary for Correct Chromosome Count; Chromosome Basics and Overview of Meiosis; Drawing Chromosomes for Example Traits |  |  |         |      |      | Interactions Between Genotype and Phenotype with Examples Traits |       |      | Fertilizing Gametes and Predicting Offspring | Mistakes in Cell Division |       |
|---------------------|-------|--------------------------------------------------------------------------------------------------------------------------------------|--|--|---------|------|------|------------------------------------------------------------------|-------|------|----------------------------------------------|---------------------------|-------|
| Teaching Activities | Admin | Task                                                                                                                                 |  |  | Lecture | Task | Task | Task                                                             | Lect. | Task | Lecture                                      | Task                      | Lect. |
| SP                  |       | None                                                                                                                                 |  |  |         |      |      | None                                                             |       |      | None                                         | None                      |       |
| CI                  |       | -                                                                                                                                    |  |  |         |      |      | -                                                                |       |      | -                                            | -                         |       |
| CC                  |       | -                                                                                                                                    |  |  |         |      |      | -                                                                |       |      | -                                            | -                         |       |

Figure 2a

| Topics              | Admin | HW Rev. | HW Review: Energy of Exothermic Dissolution | Dilution of Solutions | Activity #1: Exothermic Dissolution of $\text{CaCl}_2$ in Water |      |      |  |  |    | Activity #2: Endothermic Dissolution of $\text{NH}_4\text{Cl}$ in Water |  |  |      |
|---------------------|-------|---------|---------------------------------------------|-----------------------|-----------------------------------------------------------------|------|------|--|--|----|-------------------------------------------------------------------------|--|--|------|
| Teaching Activities | Admin | CQ      | Interaction                                 | CQ                    | Lec.                                                            | Task | Task |  |  | CQ | CQ                                                                      |  |  | Task |
| SP                  |       | None    | ✓(S)                                        | ✓(S)                  | ✓(S)                                                            |      |      |  |  |    | ✓(S)                                                                    |  |  |      |
| CI                  |       | -       | ✓                                           | None                  | ✓                                                               |      |      |  |  |    | ✓                                                                       |  |  |      |
| CC                  |       | -       | ✓                                           | -                     | ✓                                                               |      |      |  |  |    | ✓                                                                       |  |  |      |

Figure 2b

| Topics              | Admin | VSEPR   | Molecular Dipoles |  |  | Hybrid Orbitals |         |  |
|---------------------|-------|---------|-------------------|--|--|-----------------|---------|--|
| Teaching Activities | Admin | Lecture |                   |  |  | Task            | Lecture |  |
| SP                  |       | None    | ✓(I)              |  |  | None            |         |  |
| CI                  |       | -       | ✓                 |  |  | -               |         |  |
| CC                  |       | -       | ✓                 |  |  | -               |         |  |

Figure 2c

|                     |       |                |                             |                                    |
|---------------------|-------|----------------|-----------------------------|------------------------------------|
| Topics              | Admin | Review: Forces | Electric Flux & Gauss's Law | Demo: Electron Transfer by Contact |
| Teaching Activities | Admin | Lecture        |                             |                                    |
| SP                  |       | None           | None                        | None                               |
| CI                  |       | -              | -                           | -                                  |
| CC                  |       | -              | -                           | -                                  |

Figure 2d.

**Figure 2.** Representative timelines highlighting examples of each of the four possible combinations of active and 3D class segments. (2a) A 73-minute biology class session that is active but not 3D. (2b) A 77-min long chemistry class session that is both active and aligned with 3DL. (2c) A 47-min long chemistry class session that is not active but contains a 3DL-aligned segment. (2d) A 52-min physics class that is neither active nor 3D. The leftmost column provides a label for each row, with the beginning of class starting at the right edge of the label column and the end of the class session at the right edge of the timeline; the width of each segment (labelled here as Topic) is directly proportional to the time spent on that topic during the class session. Admin refers to announcements by instructor; Task refers to students engaging in a task as described in the 3D-LOP paper. Checkmarks and filled color denote the presence of a given dimension with “(I)” and “(S)” denoting Instructor or Student-centered engagement with a Scientific Practice, if present.

351

352 The four examples of class timelines in Figure 2 show that active learning and 3DL are in fact

353 different, and that these differences can be detected using the 3D-LOP. It is possible to have

354 one without the other; a class session may be highly active and yet not involve students' use of

355 knowledge to make sense of phenomena. For example, the class in which students draw the

356 stages of meiosis (shown in Figure 2a) has students engaged in tasks most of the time, but they

357 are not engaged in reasoning about Core Ideas. Rather, they are drawing diagrams of a

358 process, and those diagrams are not used to predict or explain anything further. On the other

359 hand, Figure 2b represents a class which is both active and involves 3DL where students are

360 engaged in sensemaking activities that are 3D. That is, students are engaged in tasks and

361 activities that require them to predict and explain phenomena. Figure 2c represents a class

362 where there is a 3DL segment in which the instructor is doing the work by modelling for the



363 class how VSEPR can be used to predict and explain molecular properties, but there is little  
364 meaningful input or activity from most of the students. Finally Figure 2d represents a class  
365 where there are no student-instructor interactions, the material is being delivered by a lecture,  
366 and does not include any 3D segments.

## 367 **RQ 2: How are 3DL and active learning related?**

368 As shown in the examples above, active learning and 3DL are different, and it is entirely  
369 possible to have one without the other. An important next question, then, is: how are active  
370 learning and 3DL related? To address whether there is a relationship between active learning  
371 and 3DL in our data set, we designated the 417 video segments as active or not active, and 3D  
372 or not-3D, using the criterion that 50% of the instructional time in the segment should be active  
373 and/or 3D, respectively, to qualify for that designation. Using this characterization, we were able  
374 to determine whether there is a relationship between active learning and 3D learning using a  
375 chi-square analysis. This type of analysis can determine whether co-occurrences of the two are  
376 greater than one would expect by chance. Out of the 417 video segments in our data set, more  
377 than half of them are neither 3D nor active. This is not surprising, as traditional instruction is  
378 common, particularly in large-enrollment introductory courses that make up the majority of our  
379 data set, and studies have shown that the transformation of instruction is slow (9). 93 of the 417  
380 segments were characterized as 3D, while 153 were active. 58 of these active sections were  
381 also 3D and the rest (95) were not 3D. Using these data, we find a significant association  
382 between 3D and active segments with a small-to-medium effect size (chi-square, 33.9,  $p_{\text{fisher}} < 0.001$ ,  $\phi = 0.285$ ), as shown in Figure 3.

384  
385 This chi-square test tells us that 3D and active instructional segments tend to co-occur,  
386 but it does not tell us what is driving this relationship. A post-hoc analysis using the contributions  
387 to the chi-square allowed us to calculate the standardized residual for each of the cells in the

388 contingency table (Figure 3). This provides a measure for how different the observed count is  
389 from the expected count, and thus shows which combinations are driving the associations in the  
390 table. For this table, the critical value is 9.14, and therefore, as shown in Figure 3, the major  
391 driver of significance is the higher-than-expected number of segments in which 3D & active  
392 learning co-occur.

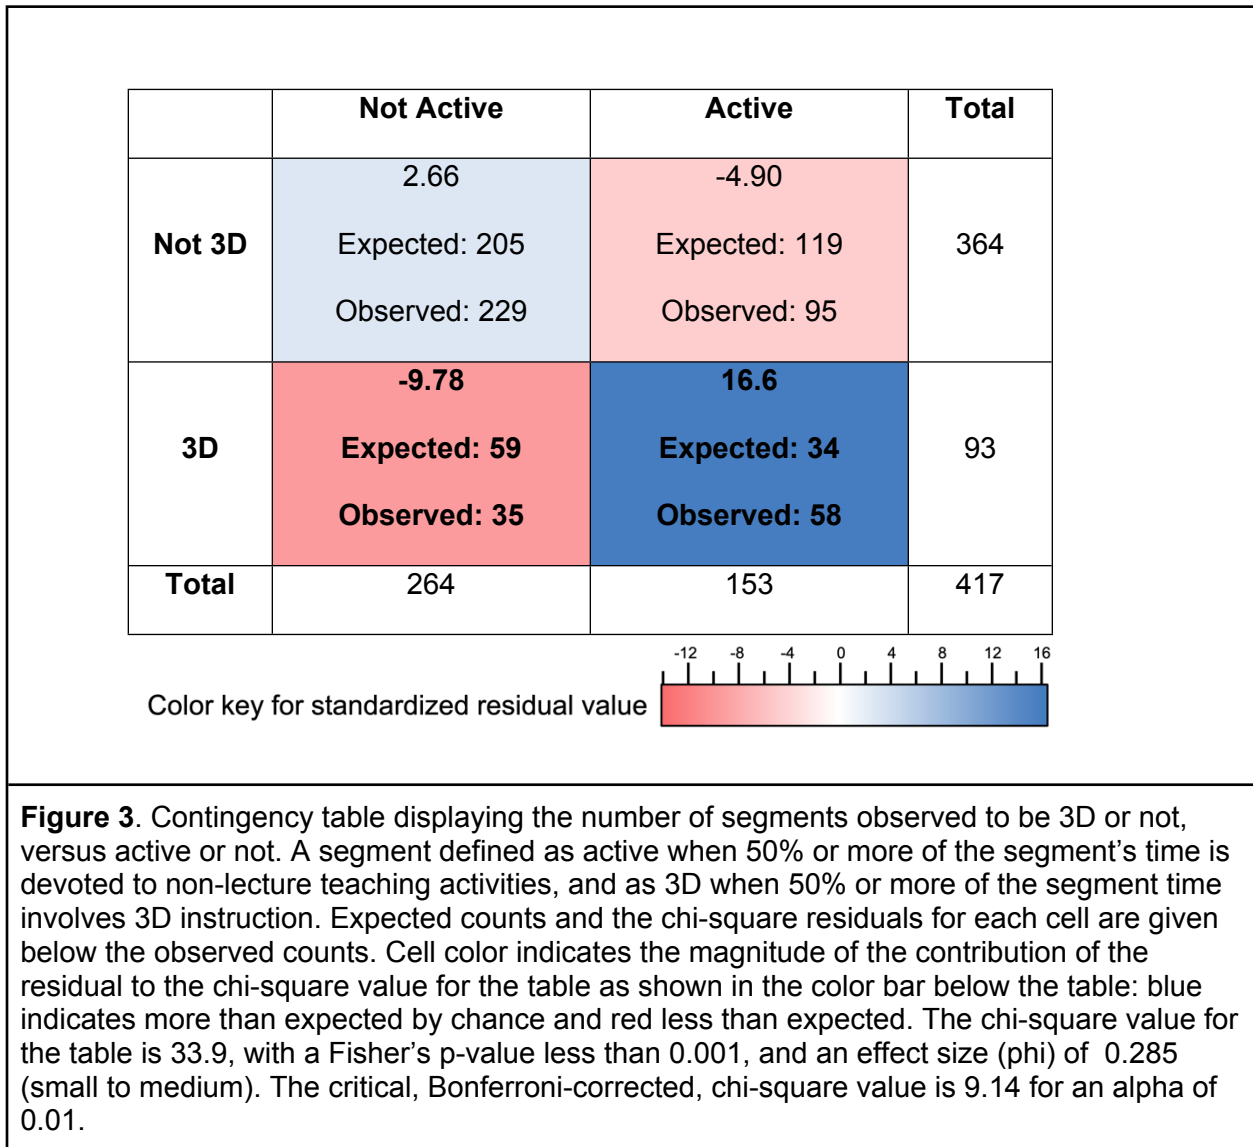

393  
394 Our findings indicate that 3D instruction is moderately associated with active learning,  
395 but that the reverse is not true. In our sample, we observed that about 1/3 of the 3D segments  
396 were not active (35/93), whereas nearly 2/3 of the active learning segments were not 3D

397 (95/153). That is, a focus on 3DL is also likely to involve active learning, whereas a focus on  
398 active learning practices is not as likely to incorporate 3DL.

## 399 **Discussion and Implications**

400 Our analysis of the video recordings from 82 classes (and 417 total instructional  
401 segments), using the 3D-LOP shows that: 1) 3D instruction and active learning are different,  
402 and it is possible to have one without the other, and 2) 3D instruction is likely to include active  
403 student engagement, whereas active learning does not necessarily include 3DL. Although we  
404 do not know how this association arises, there are several potential explanations. For example,  
405 it may be that because the Scientific and Engineering Practices are inherently active, when  
406 instructors focus on 3DL and incorporating these practices into their instruction and  
407 assessment, they are also more likely to actively engage their students. Alternatively, perhaps  
408 instructors who become aware of 3DL strategies are already cognizant of the advantages of  
409 active learning and thus incorporate them along with 3DL. It is also possible that because  
410 engaging students in Scientific Practices is at the heart of 3DL, instructors who understand 3DL  
411 and are intentional in their instructional design also incorporate active learning to engage the  
412 students. The mechanism by which an instructor comes to use 3DL almost certainly depends on  
413 the instructor and the constraints and affordances of their environment, but what seems clear is  
414 that while 3DL and active learning could both be considered evidence-based approaches to  
415 teaching and learning, only one of them provides a mechanism to support students' use of  
416 knowledge in scientifically authentic ways. Engaging in 3DL requires students to gain  
417 experience with the components of the Scientific Practices. For many students, this requires a  
418 shift from restating ideas that they have learned, learning skills that are never put into practice,  
419 or performing calculations without understanding what the result implies to understanding and  
420 articulating why a phenomenon occurs, how to use data to support a claim, or how to construct  
421 and use a model to predict and explain what happens when the system is changed. 3DL

422 provides both instructors and students with explicit guidelines for what it means to engage in  
423 Scientific Practices. Rather than the nebulous goals of “critical thinking” or “higher order  
424 thinking”, 3DL makes it possible to construct both formative and summative assessments that  
425 require engagement in 3DL in all its forms.

426 Because most faculty development is focused on incorporating student-centered  
427 pedagogies, such as those discussed in Freeman et. al. (3), this presents us with a dilemma.  
428 Should faculty development focus on active engagement, as is currently the case, or should it  
429 focus on 3DL, assuming that student engagement will follow? We caution that characterizing  
430 transformation efforts by focusing solely on active learning, without also investigating what is  
431 expected of students in terms of sensemaking and reasoning may result in the *illusion of*  
432 *transformation*, or what Wiggins and McTighe describe as “*hands on without being minds on*”  
433 (38) while at the same time maintaining the status quo.

434

435 We propose that it is time to move beyond “active learning” and refocus attention on  
436 what it is that we want students to know and do. There are many potential ways to approach  
437 redesigning teaching and learning, for example: a focus on modelling phenomena (39,40), or  
438 systems thinking (41–43). However, 3DL incorporates all these approaches (constructing  
439 models is a Scientific Practice, systems thinking is a Crosscutting Concept) as well as  
440 recognizing that none of these approaches are meaningful without connections to disciplinary  
441 Core Ideas. 3DL provides an evidence-based framework for designing instructional materials  
442 that center around student sensemaking of phenomena, and, as we have shown, tends to  
443 include student engagement, even in large lecture sections that traditionally are far more  
444 passive. We propose that focusing on creating 3DL aligned learning objectives, assessments,  
445 and instructional materials is a more fruitful approach to transforming a learning environment  
446 than the more common approach which focuses on instructional methods (EBIPs) alone. This  
447 approach recognizes that it is **what** students are doing, across a wide range of activities both

448 inside and outside of the class, rather than the mere fact that they are doing something, that  
449 ultimately can result in students having more coherent, connected, and useful disciplinary  
450 knowledge.

#### 451 **Acknowledgements:**

452 We thank the faculty who provided observational access, engaged in discussions of core ideas,  
453 and have taken steps to incorporate three-dimensional learning into their courses. We also  
454 thank our advisory board members for their helpful feedback: Stacey Lowery Bretz, Charles  
455 Henderson, Joseph Krajcik, Michelle Smith, and Marilyne Stains. Finally, our team of  
456 undergraduate research assistants (S. Luba, S. Ly, C. Morrison, K. Noyes, Z. Nusbaum,  
457 R.Thornburg, and Q. Babcock) helped code the videos for teaching activities and create 3D-  
458 LOP timelines.

459 Funding: Research funding was provided by the Association of American Universities, the MSU  
460 Office of the Provost, and the National Science Foundation [DUE 1725520].

461

#### 462 **References**

- 463 1. Lombardi D, Shipley TF, Bailey JM, Bretones PS, Prather EE, Ballen CJ, et al. The Curious  
464 Construct of Active Learning. *Psychol Sci Public Interest*. 2021 Apr 1;22(1):8–43.
- 465 2. Rahman T, Lewis SE. Evaluating the evidence base for evidence-based instructional  
466 practices in chemistry through meta-analysis. *Journal of Research in Science Teaching*.  
467 2020;57(5):765–93.
- 468 3. Freeman S, Eddy SL, McDonough M, Smith MK, Okoroafor N, Jordt H, et al. Active learning  
469 increases student performance in science, engineering, and mathematics. *PNAS*. 2014 Jun  
470 10;111:8410–5.
- 471 4. Ballen CJ, Wieman C, Salehi S, Searle JB, Zamudio KR. Enhancing Diversity in  
472 Undergraduate Science: Self-Efficacy Drives Performance Gains with Active Learning. *LSE*.  
473 2017 Dec;16(4):ar56.
- 474 5. Theobald EJ, Hill MJ, Tran E, Agrawal S, Arroyo EN, Behling S, et al. Active learning  
475 narrows achievement gaps for underrepresented students in undergraduate science,

- 476 technology, engineering, and math. Proceedings of the National Academy of Sciences.  
477 2020 Mar 24;117(12):6476–83.
- 478 6. Chasteen SV, Chattergoon R, Prather EE, Hilborn R. Evaluation methodology and results  
479 for the new faculty workshops. In AMER ASSOC PHYSICS TEACHERS; 2016.
- 480 7. Chasteen SV, Chattergoon R. Insights from the Physics and Astronomy New Faculty  
481 Workshop: How do new physics faculty teach? Physical Review Physics Education  
482 Research. 2020;16(2):020164.
- 483 8. Stains M, Pilarz M, Chakraverty D. Short and Long-Term Impacts of the Cottrell Scholars  
484 Collaborative New Faculty Workshop. J Chem Educ. 2015 Sep 8;92(9):1466–76.
- 485 9. Stains M, Harshman J, Barker MK, Chasteen SV, Cole RS, DeChenne-Peters SE, et al.  
486 Anatomy of STEM teaching in North American Universities. Science. 2018 Mar  
487 30;359(6383):1468–70.
- 488 10. Schulz HW, FitzPatrick B. Teachers' understandings of critical and higher order thinking and  
489 what this means for their teaching and assessments. Alberta Journal of Educational  
490 Research. 2016;62(1):61–86.
- 491 11. National Research Council. Discipline-based education research: Understanding and  
492 improving learning in undergraduate science and engineering. Singer, S. R, Nielson, N. R.,  
493 Schweingruber, H. A., editors. Washington, DC: National Academies Press; 2012.
- 494 12. Cooper MM, Caballero MD, Ebert-May D, Fata-Hartley CL, Jardeleza SE, Krajcik JS, et al.  
495 Challenge faculty to transform STEM learning. Science. 2015 Oct 16;350(6258):281–2.
- 496 13. National Research Council. A Framework for K-12 Science Education: Practices,  
497 Crosscutting Concepts, and Core Ideas. Washington, DC: The National Academies Press;  
498 2012.
- 499 14. Cooper MM, Posey LA, Underwood SM. Core ideas and topics: Building up or drilling down?  
500 J Chem Educ. 2017;94(5):541–8.
- 501 15. Lavery JT, Underwood SM, Matz RL, Posey LA, Carmel JH, Caballero MD, et al.  
502 Characterizing college science assessments: The Three-Dimensional Learning Assessment  
503 Protocol. PLoS ONE. 2016;11:e0162333.
- 504 16. Bain K, Bender L, Bergeron P, Caballero MD, Carmel JH, Duffy EM, et al. Characterizing  
505 college science instruction: The Three-Dimensional Learning Observation Protocol. PLOS  
506 ONE. 2020 Jun 16;15(6):e0234640.
- 507 17. Matz RL, Fata-Hartley CL, Posey LA, Lavery JT, Underwood SM, Carmel JH, et al.  
508 Evaluating the extent of a large-scale transformation in gateway science courses. Science  
509 Advances. 2018 Oct 1;4(10):eaau0554.
- 510 18. Cooper MM, Klymkowsky MW. Chemistry, Life, the Universe and Everything: A new  
511 approach to general chemistry, and a model for curriculum reform. J Chem Educ.  
512 2013;90:1116–22.

- 513 19. Ralph VR, Scharlott LJ, Schafer AGL, Deshaye MY, Becker NM, Stowe RL. Advancing  
514 Equity in STEM: The Impact Assessment Design Has on Who Succeeds in Undergraduate  
515 Introductory Chemistry. *JACS Au*. 2022 2, 8, 1869–1880
- 516 20. Crandell OM, Kouyoumdjian H, Underwood SM, Cooper MM. Reasoning about Reactions in  
517 Organic Chemistry: Starting It in General Chemistry. *J Chem Educ*. 2019;96(2):213–26.
- 518 21. Crandell OM, Lockhart MA, Cooper MM. Arrows on the Page Are Not a Good Gauge:  
519 Evidence for the Importance of Causal Mechanistic Explanations about Nucleophilic  
520 Substitution in Organic Chemistry. *J Chem Educ*. 2020 Feb 11;97(2):313–27.
- 521 22. Houchlei SK, Bloch RR, Cooper MM. Mechanisms, Models, and Explanations: Analyzing the  
522 Mechanistic Paths Students Take to Reach a Product for Familiar and Unfamiliar Organic  
523 Reactions. *J Chem Educ [Internet]*. 2021 Aug 13 [cited 2021 Aug 16]; Available from:  
524 <https://doi.org/10.1021/acs.jchemed.1c00099>
- 525 23. Noyes K, McKay RL, Neumann M, Haudek KC, Cooper MM. Developing Computer  
526 Resources to Automate Analysis of Students' Explanations of London Dispersion Forces. *J*  
527 *Chem Educ*. 2020 Nov 10;97(11):3923–36.
- 528 24. Underwood SM, Reyes-Gastelum D, Cooper MM. Answering the questions of whether and  
529 when student learning occurs: Using discrete-time survival analysis to investigate how  
530 college chemistry students' understanding of structure-property relationships evolves. *Sci*  
531 *Educ*. 2015;99(6):1055–72.
- 532 25. Underwood SM, Kararo AT, Gadia G. Investigating the impact of three-dimensional learning  
533 interventions on student understanding of structure–property relationships. *Chem Educ Res*  
534 *Pract*. 2021 Apr 7;22(2):247–62.
- 535 26. Bowen RS, Flaherty AA, Cooper MM. Investigating student perceptions of transformational  
536 intent and classroom culture in organic chemistry courses. *Chemistry Education Research*  
537 *and Practice*. 2022;23(3):560–81.
- 538 27. Ralph VR, Scharlott LJ, Schwarz CE, Becker NM, Stowe RL. Beyond instructional practices:  
539 Characterizing learning environments that support students in explaining chemical  
540 phenomena. *Journal of Research in Science Teaching*. 2022;59(5):841–75.
- 541 28. Irving PW, Obsniuk MJ, Caballero MD. P3: a practice focused learning environment. *Eur J*  
542 *Phys*. 2017 Jun;38(5):055701.
- 543 29. Williams L, Upchurch RL. In support of student pair-programming. *SIGCSE Bull*. 2001 Feb  
544 1;33(1):327–31.
- 545 30. Braught G, Wahls T, Eby LM. The Case for Pair Programming in the Computer Science  
546 Classroom. *ACM Trans Comput Educ*. 2011 Feb;11(1):1–21.
- 547 31. Paxton J. Live programming as a lecture technique. *Journal of Computing Sciences in*  
548 *Colleges*. 2002;18(2):51–6.
- 549 32. Hamerski PC, Irving PW, McPadden D. Learning assistants as student partners in  
550 introductory physics. *Phys Rev Phys Educ Res*. 2021 Aug 13;17(2):020107.

- 551 33. Irving PW, McPadden D, Caballero MD. Communities of practice as a curriculum design  
552 theory in an introductory physics class for engineers. *Phys Rev Phys Educ Res.* 2020 Dec  
553 4;16(2):020143.
- 554 34. Griswold K, McPadden DR, Caballero MD, Irving PW. Denoting and Comparing Leadership  
555 Attributes and Behaviors in Group Work. In 2018 [cited 2023 Aug 15]. Available from:  
556 <https://www.per-central.org/items/detail.cfm?ID=14790>
- 557 35. Hamerski PC, McPadden D, Caballero MD, Irving PW. Students' perspectives on  
558 computational challenges in physics class. *Phys Rev Phys Educ Res.* 2022 Aug  
559 2;18(2):020109.
- 560 36. Lund TJ, Pilarz M, Velasco JB, Chakraverty D, Rosploch K, Undersander M, et al. The best  
561 of both worlds: building on the COPUS and RTOP observation protocols to easily and  
562 reliably measure various levels of reformed instructional practice. *CBE Life Sci Educ.* 2015  
563 Jun 1;14(2):ar18.
- 564 37. Smith MK, Jones FHM, Gilbert SL, Wieman CE. The classroom observation protocol for  
565 undergraduate STEM (COPUS): A new instrument to characterize university STEM  
566 classroom practices. *CBE Life Sci Educ.* 2013 Dec 21;12(4):618–27.
- 567 38. Wiggins GP, McTighe J. *Understanding by Design*. 2nd ed. Alexandria, VA: Association for  
568 Supervision and Curriculum Development; 2005.
- 569 39. Brewe E, Sawtelle V, Kramer LH, O'Brien GE, Rodriguez I, Pamelá P. Toward equity  
570 through participation in Modeling Instruction in introductory university physics. *Phys Rev ST*  
571 *Phys Educ Res.* 2010 May 20;6(1):010106.
- 572 40. Posthuma-Adams E. How the Chemistry Modeling Curriculum Engages Students in Seven  
573 Science Practices Outlined by the College Board. *Journal of Chemical Education.* 2014 Sep  
574 9;91(9):1284–90.
- 575 41. Momsen J, Speth EB, Wyse S, Long T. Using systems and systems thinking to unify biology  
576 education. *CBE—Life Sciences Education.* 2022;21(2):es3.
- 577 42. Orgill M, York S, MacKellar J. Introduction to Systems Thinking for the Chemistry Education  
578 Community. *J. Chem. Educ.* 2019, 96, 12, 2720–2729
- 579 43. Verhoeff RP, Knippels MCP, Gilissen MG, Boersma KT. The theoretical nature of systems  
580 thinking. Perspectives on systems thinking in biology education. In: *Frontiers in Education.*  
581 *Frontiers Media SA*; 2018. p. 40.

582

583

584

585

586

587
